# Supplementary material for: Constructing a green oleaginous yeast cell factory for sustainable production of the plant-derived diterpenoid sclareol
Source: Royal Society of Chemistry journal article supplement (doi:10.1039/d3gc04949c), 2024-01-01
Supplement: d3gc04949c1.pdf [file d3gc04949c1.pdf]

## **Electronic Supplementary Information**

### **Constructing a green oleaginous yeast cell factory for sustainable production of the plant-derived diterpenoid sclareol**

Mei-Li Sun<sup>a</sup>, Yuting Han<sup>a</sup>, Xiao Yu<sup>a</sup>, Kaifeng Wang<sup>a</sup>, Lu Lin<sup>a</sup>, Rodrigo Ledesma-Amaro<sup>b</sup>, Xiao-Jun Ji<sup>a\*</sup>

<sup>a</sup> State Key Laboratory of Materials-Oriented Chemical Engineering, College of Biotechnology and Pharmaceutical Engineering, Nanjing Tech University, No. 30 South Puzhu Road, Nanjing 211816, People's Republic of China

<sup>b</sup> Department of Bioengineering and Imperial College Centre for Synthetic Biology, Imperial College London, London SW7 2AZ, UK

Correspondence: [xiaojunji@njtech.edu.cn](mailto:xiaojunji@njtech.edu.cn) (X.-J. Ji)

## Supplementary Methods:

### Analytical methods of dodecane proportion in fed-batch fermentation

In fed-batch fermentation, approximately 20% dodecane was added for the extraction of sclareol, resulting in a 5-fold product concentration in the dodecane phase. However, the dodecane proportion changed with periodic sampling and subsequent feeding, which had a direct effect on sclareol quantification. To attain the accurate titer of sclareol generated by the strain to the maximum extent possible, the dodecane ratio was corrected as follows:

A) Before sampling, the total volume of culture was  $V_{cn}$  ml, the volume of dodecane was  $V_{dn-1}$  ml, so the dodecane ratio  $a_n$  was:

$$a_n = \frac{V_{dn}}{V_{cn}}$$

B) Then, a sample of  $V_{rn+1}$  ml was taken from the bioreactor. Assuming a homogeneous system under high-speed stirring, the dodecane ratio of the sample was  $a_n$ . If the glucose, NaOH solution and antifoam was fed  $V_{fn+1}$  after sampling, the dodecane ratio  $a_{n+1}$  was:

$$a_{n+1} = \frac{V_{dn+1}}{V_{cn+1}} = \frac{V_{dn} - V_{rn+1} \times a_n}{V_{cn} + V_{fn+1} - V_{rn+1} \times (1 - a_n)}$$

C) If the dodecane phase was diluted  $b_n$  times for gas chromatogram, the sclareol titer was measured as  $c_{mn}$  mg/L, and the accurate titer of sclareol ( $c_n$  mg/L) in this sampling was:

$$c_n = a_n \times b_n \times c_{mn}$$

**Supplementary Table 1. Plasmids used in this study.**

| <b>Plasmids</b>                     | <b>Genotype or properties</b>                                                           | <b>Sources</b> |
|-------------------------------------|-----------------------------------------------------------------------------------------|----------------|
| pUC-Leu-A08-CcCLS                   | P <sub>TEFin</sub> -CcCLS-T <sub>xpr2t</sub> cassette in pUC-Leu-A08                    | This study     |
| pUC-Leu-A08-SsLPPS                  | P <sub>TEFin</sub> -SsLPPS-T <sub>xpr2t</sub> cassette in pUC-Leu-A08                   | This study     |
| pUC-HUH-IntE2-SsSCS                 | P <sub>TEFin</sub> -SsSCS-T <sub>xpr2t</sub> cassette in pUC-HUH-IntE2                  | This study     |
| pUC-HUH-IntC-tHMG                   | P <sub>TEFin</sub> -tHMG-T <sub>xpr2t</sub> cassette in pUC-HUH-IntC                    | 1              |
| pUC-HUH-SCP2-ERG20                  | P <sub>TEFin</sub> -ERG20-T <sub>xpr2t</sub> cassette in pUC-HUH-SCP2                   | 1              |
| pUC-Leu-A08-dCcCLS                  | P <sub>TEFin</sub> -dCcCLS-T <sub>xpr2t</sub> cassette in pUC-Leu-A08                   | This study     |
| pUC-Leu-A08-dSsLPPS                 | P <sub>TEFin</sub> -dSsLPPS-T <sub>xpr2t</sub> cassette in pUC-Leu-A08                  | This study     |
| pUC-HUH-IntE2-dSsSCS                | P <sub>TEFin</sub> -dSsSCS-T <sub>xpr2t</sub> cassette in pUC-HUH-IntE2                 | This study     |
| pUC-HUH-IntA-YIGGPPS                | P <sub>TEFin</sub> -YIGGPPS-T <sub>xpr2t</sub> cassette in pUC-HUH-IntA                 | This study     |
| pUC-HUH-IntA-SsGGPPS                | P <sub>TEFin</sub> -SsGGPPS-T <sub>xpr2t</sub> cassette in pUC-HUH-IntA                 | This study     |
| pUC-HUH-IntA-PaGGPPS                | P <sub>TEFin</sub> -PaGGPPS-T <sub>xpr2t</sub> cassette in pUC-HUH-IntA                 | This study     |
| pUC-HUH-IntA-SaGGPPS                | P <sub>TEFin</sub> -SaGGPPS-T <sub>xpr2t</sub> cassette in pUC-HUH-IntA                 | This study     |
| pUC-HUH-lip1-PaGGPPS                | P <sub>TEFin</sub> -PaGGPPS-T <sub>xpr2t</sub> cassette in pUC-HUH-lip1                 | This study     |
| pUC-Leu-A08-dSsLPPS <sub>RIDD</sub> | P <sub>TEFin</sub> -dSsLPPS <sub>RIDD</sub> -T <sub>xpr2t</sub> cassette in pUC-Leu-A08 | This study     |
| pUC-Leu-A08-dSsLPPS <sub>RIAD</sub> | P <sub>TEFin</sub> -dSsLPPS <sub>RIAD</sub> -T <sub>xpr2t</sub> cassette in pUC-Leu-A08 | This study     |
| pUC-HUH-IntE2-SsSCS <sub>RIDD</sub> | P <sub>TEFin</sub> -SsSCS <sub>RIDD</sub> -T <sub>mig1t</sub> cassette in pUC-HUH-IntE2 | This study     |
| pUC-HUH-IntE2-SsSCS <sub>RIAD</sub> | P <sub>TEFin</sub> -SsSCS <sub>RIAD</sub> -T <sub>mig1t</sub> cassette in pUC-HUH-IntE2 | This study     |

**Supplementary Table 2. Primers used in this study.**

| Names           | Sequences (5' > 3')                            |
|-----------------|------------------------------------------------|
| A08-CcCLS-F     | CAGCACTTTTTGCAGTACTAACCGCAGGCTTTCACCTT         |
| A08-CcCLS-R     | AAGTTCCGTAGTTGGATCCTACGTATTAGACCACGGACTCAAACAG |
| A08-SsLPPS-F    | CAGCACTTTTTGCAGTACTAACCGCAGACCTCCGTGAA         |
| A08-SsLPPS-R    | TCCGTAGTTGGATCCTACGTATTAACGACAGGTCGGAACAGG     |
| IntE2-TEFin-F   | ATTGACTGGAACAGCTTAAGAGACCGGGTTGGCGGC           |
| SsSCS-TEFin-R   | GACTGCGGTTAGTACTGCAAAAAGTGCTGGTCCGAT           |
| SsSCS-F         | TTGCAGTACTAACCGCAGTCCCTGGCTTTCAA               |
| SsSCS-R         | ACAAGTTCCGTAGTTGGATCTTAAAAAACGAAGGACTTCATGTC   |
| SsSCS-xpr2t-F   | AAGATCCAACACTACGGAAGTTGTGTTGATGTC              |
| IntE2-xpr2t-R   | TATCGCAATCCACACTTAATTAAGACACGGGCATCTCACTTGC    |
| A08-dCcCLS-F    | CAGCACTTTTTGCAGTACTAACCGCAGTGCTCCGCTCGACGAAC   |
| A08-dCcCLS-R    | AGTTCCGTAGTTGGATCCTACGTATTAGACCACGGACTCAAACAG  |
| A08-dSsLPPS-F   | CAGCACTTTTTGCAGTACTAACCGCAGGACGCTTCTCAGGCTT    |
| A08-dSsLPPS-R   | CCGTAGTTGGATCCTACGTATTAACGACAGGTCGGAACAGGACC   |
| IntE2-TEFin-F   | ATTGACTGGAACAGCTTAAGAGACCGGGTTGGCGGC           |
| dSsSCS-TEFin-R  | TTGCAGTACTAACCGCAGGCTAAGATGAAGGAGAAC           |
| dSsSCS-F        | CCTGCGGTTAGTACTGCAAAAAGTGCTGGTCCG              |
| IntE2-xpr2t-R   | TATCGCAATCCACACTTAATTAAGACACGGGCATCTCACTTGC    |
| IntA-TEFin-F    | CTGATTGACTGGAACAGCTTAATTAAGAGACCGGGTTGGCGGC    |
| YIGGPPS-TEFin-R | CCTGCGGTTAGTACTGCAAAAAGTGCTGGTCCG              |

|                 |                                             |
|-----------------|---------------------------------------------|
| YIGGPPS-F       | TTGCAGTACTAACCGCAGGATTATAACAGCGCGGATT       |
| YIGGPPS-R       | TAGTTGGATCTCACTGCGCATCCTCAAAGTAC            |
| YIGGPPS-xpr2t-F | TGCGCAGTGAGATCCAACACTACGGAACCTTGTGTTG       |
| IntA-xpr2t-R    | CCAAAGCTTGGTACCTTAATTAAGACACGGGCATCTCACTTGC |
| IntA-TEFin-F    | CTGATTGACTGGAACAGCTTAATTAAGAGACCGGGTTGGCGGC |
| PaGGPPS-TEFin-R | AGCTGCGGTTAGTACTGCAAAAAGTGCTGGT             |
| PaGGPPS-F       | TTGCAGTACTAACCGCAGCTCTCGACAGGTCTGAGT        |
| PaGGPPS-R       | TCCGTAGTTGGATCTCAATGATGGTGGTGGTATGG         |
| PaGGPPS-xpr2t-F | CACCACCATCATTGAGATCCAACACTACGGAACCTTGTGTTG  |
| IntA-xpr2t-R    | CCAAAGCTTGGTACCTTAATTAAGACACGGGCATCTCACTTGC |
| IntA-TEFin-F    | CTGATTGACTGGAACAGCTTAATTAAGAGACCGGGTTGGCGGC |
| SaGGPPS-TEFin-R | GACTGCGGTTAGTACTGCAAAAAGTGCTGGTTCG          |
| SaGGPPS-F       | TTGCAGTACTAACCGCAGTCTTACTTCGACAAC           |
| SaGGPPS-R       | GGATCTTACTTTCGTCTTCGGATGGTGA                |
| SaGGPPS-xpr2t-F | CGAAGACGAAAGTAAGATCCAACACTACGGAACCTTGTGTTG  |
| IntA-xpr2t-R    | CCAAAGCTTGGTACCTTAATTAAGACACGGGCATCTCACTTGC |
| IntA-TEFin-F    | CTGATTGACTGGAACAGCTTAATTAAGAGACCGGGTTGGCGGC |
| SsGGPPS-TEFin-R | CCTGCGGTTAGTACTGCAAAAAGTGCTGGTTCG           |
| SsGGPPS-F       | TTGCAGTACTAACCGCAGGTCGCTCAGAC               |
| SsGGPPS-R       | GTTGGATCTTAGTGCTGTCGTCGGTAATAAA             |
| SsGGPPS-xpr2t-F | CGACAGCACTAAGATCCAACACTACGGAACCTTGTGTTG     |
| IntA-xpr2t-R    | CCAAAGCTTGGTACCTTAATTAAGACACGGGCATCTCACTTGC |

|                          |                                                                                                                        |
|--------------------------|------------------------------------------------------------------------------------------------------------------------|
| lip1Pa-TEFin-F           | ATTGACTGGAACAGCTTAATTAAGAGACCGGGTTGGCGGC                                                                               |
| lip1Pa-xpr2t-R           | GTCGAACAAAAGCTTGGTACCTTAAGACACGGGCATCTCACTTG                                                                           |
| TEFin-dSsLPPS-F          | GCACTTTTTGCAGTACTAACCAGCAGGACGCTTCTCAGGCTTCT                                                                           |
| RIDD-dSsLPPS-R           | CCACCACCACCAACGACAGGTCCGAACAGGACCTTGAAGAT                                                                              |
| dSsLPPS-RIDD-F           | TGTCGTTGGTGGTGGTGGTTCTGGTGGTGGTGGCTCT                                                                                  |
| xpr2t-RIDD-R             | AGTTCCGTAGTTGGATCCTACGTATTACTTGGCCTCCTCCTTCTCC                                                                         |
| TEFin-dSsLPPS-F          | CAGCACTTTTTGCAGTACTAACCAGCAGGACGCTTCTCAGGCTTC                                                                          |
| xpr2t-RIAD-<br>dSsLPPS-R | CCGTAGTTGGATCCTACGTATTAACAGCCCTCGGTGGCCTCCTTGATGATCTG<br>ATCGGCCAGCTGATTGGCGTACTGCTCCAGACCACAACCGCCACCACCAGA           |
| IntE2-TEFin-F            | ATTGACTGGAACAGCTTAAGAGACCGGGTTGGCGGC                                                                                   |
| SsSCS-TEFin-R            | GACTGCGGTTAGTACTGCAAAAAGTGCTGGTCCGAT                                                                                   |
| SsSCS-F                  | TTGCAGTACTAACCAGCAGTCCCTGGCTTTCAA                                                                                      |
| RIDD-SsSCS-R             | GAACCACCACCACCAAAAACGAAGGACTTCATGTCCTC                                                                                 |
| SsSCS-RIDD-F             | CTTCGTTTTTGGTGGTGGTGGTTCTGGTGGTGGTGGCTCTGGT                                                                            |
| mig1t-RIDD-R             | TCGACCGCCAGTGTTACTTGGCCTCCTCCTTCTCCAGTCGCTC                                                                            |
| RIDD-mig1t-F             | CCAAGTAACACTGGCCGGTCGATAATTTAACGTGC                                                                                    |
| IntE2-mig1t-R            | CGCAATCCACACTTAATTA AAAA ACCCAA AAGGGCCGAAGGCTGG                                                                       |
| IntE2-TEFin-F            | ATTGACTGGAACAGCTTAAGAGACCGGGTTGGCGGC                                                                                   |
| mig1t-RIAD-<br>SsSCS-R   | TTAAATTATCGACCGCCAGTGTTAACAGCCCTCGGTGGCCTCCTTGATGATC<br>TGATCGGCCAGCTGATTGGCGTACTGCTCCAGACCACAACCGCCACCACCAG<br>AGCCAC |
| RIAD-mig1t-F             | ACCGAGGGCTGTTAACACTGGCCGGTCGATAATTT                                                                                    |
| IntE2-mig1t-R            | CGCAATCCACACTTAATTA AAAA ACCCAA AAGGGCCGAAGGCTGG                                                                       |

---

**Supplementary Table 3. Synthetic gene fragment and gene sequences used in this study.**

| Names                                                                                                                                                                                                                                                                                       | Sequences (5' -> 3')                                                                                                                                                                                                                                                                                                                                                                                                                                                                                                                                                                                                                                                                                                                                                                                                                                                                                                                                                                                                                                                                                                                                                                                                                                                                                                                                                                                                                                                                                                                                                                                                                                                                                                                                                                                                                                                                                                                                                                                                                                                                                                                                                                                                                                                                                                                                                                                                                                                                                                                                                                                                                                           |
|---------------------------------------------------------------------------------------------------------------------------------------------------------------------------------------------------------------------------------------------------------------------------------------------|----------------------------------------------------------------------------------------------------------------------------------------------------------------------------------------------------------------------------------------------------------------------------------------------------------------------------------------------------------------------------------------------------------------------------------------------------------------------------------------------------------------------------------------------------------------------------------------------------------------------------------------------------------------------------------------------------------------------------------------------------------------------------------------------------------------------------------------------------------------------------------------------------------------------------------------------------------------------------------------------------------------------------------------------------------------------------------------------------------------------------------------------------------------------------------------------------------------------------------------------------------------------------------------------------------------------------------------------------------------------------------------------------------------------------------------------------------------------------------------------------------------------------------------------------------------------------------------------------------------------------------------------------------------------------------------------------------------------------------------------------------------------------------------------------------------------------------------------------------------------------------------------------------------------------------------------------------------------------------------------------------------------------------------------------------------------------------------------------------------------------------------------------------------------------------------------------------------------------------------------------------------------------------------------------------------------------------------------------------------------------------------------------------------------------------------------------------------------------------------------------------------------------------------------------------------------------------------------------------------------------------------------------------------|
| <p>Codon optimized (-)-8-hydroxy copalyl diphosphate synthase coding DNA (<i>CcCLS</i>) for <i>Y. lipolytica</i> based on the sequence of (-)-8-hydroxy copalyl diphosphate synthase (GenBank: ADJ93862.1) from <i>Cistus criticus</i></p>                                                  | <p>ATGGCTTTCACCTTACCTCCGCCACCTGTTCTGCCTGTCACCCGAGAACCCTCCGTCCACGT<br/>CAACTACTCCATCCCCCGGTAACCTGGCGACTCTGGTCTACCGCTAAGGGCGGTTCCAACAAG<br/>CTCGACATCCGACGACTCCGATGCTCCGCTCGACGAACCCCTGAGCCTTGGCTCAGGGTTCTA<br/>ACGGCGGTGAGACGGGTGTCGAGGCTATCCAGCGACTGCAGACCATCGCCGACGACAAGATCG<br/>ACGGCGGTGCTAACGAGCTGGGTATCGTCTGTTGGGACCTCATTTCGAGACGGCGTTCGACGCTGT<br/>CAAGTCTATGTTTACTCCATGGGCGACGAGACATCTCCATCTCCGCTACGACACCCGCTGG<br/>GTTGCTCTGGTTAAGGACGTGAACGGATCTGGCGGCCCCAGTTTCTTCTCTCCAGTGGAA<br/>TTGTGGACAACCAGCTGCCCGACGGCTCTGGGGTACTCTGAGGTTTTTCCGCTTACGACCG<br/>ACTGCTGAAGACCCTGGTTGTTGTCGCCCTCAAGTCTGGAACATCCGACCGACAAGTGC<br/>CAGAAGGGCCTGAAGTCTTTTCGAGACAACATTTCCAAGCTGGAGAAGGAGAACCCTCGAGGCC<br/>TCCGCTCAGATGCTGTCCGGTTTCGAGGTCGTCTCTCTGTCCTCATCGAGGTTGCCGACGACT<br/>CGACATCCAGATCCCCCTGCCATCCCTGTCTTTGAGGACCTGATTGCTCGACGAAACCTCAAG<br/>TTCGCCAAGATCCCCCTGGACCTGATGCACAACGTCCCCACCTCCCTGCTGAACCTCCCTGGAGG<br/>GTATGACCGCGCTCGAGCTGGACTGGGAGAAGCTGCTGAAGCTCCAGTCTCAGGACGGTTCT<br/>TTATCACTCCCTCCACCCGCTTCCGCTCTGATGCAGACCAACGACCAAGTGCAGTCCCTGGG<br/>CTACCTGAAGTTTGTGTTTCAAGAAGTTCAACGGCGGCGCCCGGTCAGTACCCTGTTGAGATT<br/>TTCGAGCGAATCTGGTCTGGACCGACTGCAGCGACTGGGTATCTCCCGTACTTCCAGTCCG<br/>AGATTAAGGAGTGTCTGGTACGCTTACGCTTCAAGCACTGGACCACTACCGCTCTCTGGGG<br/>TCGAAACACCCCTGTTTACGACCTGGACGACACCTGCATGGCCTTTAGAAATTTTGCAGTGCAC<br/>GGTACGAGCTGTCCGCTGAGGCTTTCGACACTTCGAGAAGAAGCGGCTCTTCTTCTGCTTCG<br/>GCTGGGAGACCCAGTACCTTACCTTAACTTCAACCTGTACCGAGCTTCCGCTTCTTCTGGG<br/>TCCCGGTGAGAACATTCTCAAGGAGGCTAAGCAGTTTTCTTAACTTCTCATGAAGAAGCAG<br/>GCCGCCCCGAGAGTCCAGGACAAGTGGGTTATCTGAAGGACTTCCCGGTGAGCTGAAGTAC<br/>GCCCTGGAGTTCCTGTTACGCTTCCGCTTCCGCTCGAGTGCAGACCCGATCTACGCTGAGCAGT<br/>ACGGTGGCGACAACGACGCTGATCGGCAAGACCCTTACCAGTGCCTACATCAACAACA<br/>ACGTCTACCTCGAGCTGGCAAGCTGGACTTAACTCAACTGCCAGGCCCTGACCCGAAAGT<br/>GGGAGACCATGCAGAAGTGGTTTATGAGGTCCAAAGCTGGACGAGTTCGCGCTCTTCTTAA<br/>CCCTGCTGGAGTCTACTTCTGCGCCGCTGCTTCCATTTTGGAGCCGAGCGATCTACCGAGCG<br/>ACTGGCTTGGGCTAAGACCGCTTTCCTCATGGAGACCATGGCTCCTACTTCGACGACGAGATG<br/>AACTCAAGGACCTGCGAAAGCCCTTCGTTCAAGGAGTTTAAAGAATCTACGACGACGACGAA<br/>GAGGCCAAGGGTACTAAGTGAACCTGATCATCATTCTGCTGACCACCTGAACCACCTCACC<br/>GAGGTCTGCGGACGAGACATCAACTCTACCTGTGCCACTCCTGGGAGAAGTGGATGATGATG<br/>TGGGAGCCGAGGGCGACCGATACAAGGGTGTGCTGCTGAGCTGCTGCAACTCATCAACTG<br/>TCTTCCGACGACTGTTTTCAACGACACCCTGTCCACCCCAACTACGAGAAGCTGGTGACCC<br/>TGTTCAACAAGCTGTGCCACCAGCTGGGCACTCCCGACGAGGTAACCAACAGGAGGACTCTG<br/>ACATCAAGGACACCAAGATCGAGATCGCCATGCAAGGAGTGGTCCAGCTGGTCCACCAAGT<br/>CCTCCGACGACATCTCCATGGACCTGAAGCAGACCTTCTTCGCCGTGGTGGATCCTTCTACTA<br/>CGCCGCTACTGCGACCGAGGCCACCATTAACCTCCACATCGTTAAGGTCCTGTTTGGAGTCCGT<br/>GTCTAA</p> |
| <p>Codon optimized (13E)-8<math>\alpha</math>-hydroxylabden-15-yl diphosphate synthase coding DNA (<i>SsSCS</i>) for <i>Y. lipolytica</i> based on the sequence of (13E)-8<math>\alpha</math>-hydroxylabden-15-yl diphosphate synthase (GenBank: AFU61897.1) from <i>Salvia sclarea</i></p> | <p>ATGACCTCCGTGAACCTGTCGCGAGCCCTGCTGCTATCATCCGACGACGACTGCAGCTGCAGC<br/>CCGAGTTTACGCTGAGTGTCTGGCTGAAGTCTCTCCCAAGACGCCCCCTTACCCTTCTCT<br/>TGCCAGATCCGACCCAAGCAGCTCTCCAGATTGCCGAGCTGCGAGTACCTCCCTGGACGCTT<br/>CTCAGGCTTCTGAGAAGGACATCTCCCTCGTCCAGACCCCAAGGTCGAGGTTAACGAGAGA<br/>AGATCGAGGAGTCCATCGATCGTTCAGAACCTGCTGATGACCTCCGGAGGAGCCCGAATTT<br/>CCGTCTCCCTTACGACACCCCGCTCATCGCTCTCATCAAGGACCTGAAGGGCCGAGACGCC<br/>TCAGTTTCTTCTGCTGCTGAGTGGATCGCCACCACCAGCTGGCTGACCGGTTCTTGGGGTAC<br/>GAGTTTTCTGTATTTACGACCGAATCTCGAACCCCTGGTTGCTGCTGCCCTCAAGTCTTTG<br/>GAACCTCCAGTCCGACATCATCGAGAAGGGCGTACCTACATCAAGGAGAACGTGCACAAGCT<br/>GAAGGGCGCCAACGTGGAGCAGCAAGCCGCTGGTTTTGAGCTGGTCTGCCACCTCATGCA<br/>GATGGCCACCGACTGGCATTACGGACTCCCTTACGACCCCTCATCAAGGAGTACGCG<br/>CGACACCAAGAAGCAGCGACTGAAGGAGATCCCCAAGGACCTCGTCTACCAGATGCCACCAA<br/>CCTGCTGTACTCCCTCGAGGGTCTCGGCGACCTGGAGTGGGAGCGACTGCTGAAGCTGCAGTCC<br/>GGAAACGGCTCCTTCCGACTCCCTTCCCTCCACCGCTGCTGTTCTCATGCAACCAAGGACG<br/>AGAAGTGTCTGAAGTACATTGAGAACGCTCTGAAGAAGTGCAGCGGCGGCTCCTCACACCT<br/>ACCCTGTTGACATCTTCTCCGACTGTGGGCCATCGACCGACTGCAGGACTGGGTATCTCCCG<br/>ATTCTTCCAGCAGGATTAAGTACTTCTGGACACATCGAGTCCGCTGGGAGGAGACCCG<br/>AGTCTTTTCTGGCCGATACACCAAGTTTTCCGACATCGACGACACCTCCATGGCGTCCGACTC<br/>CTGAAGATGCACGGTACGACGCTGACCCCAACGTCCTGAAGCACTTCAAGCAGCAGGACCGG<br/>AAGTTTTCTGCTACATCGGCCAGTCCGTGGAGTCCGCTTCCCTATGTACAACCTGTACCGAG<br/>CCGCCAGCTCCGATTCCCTGGTGGAGGTTTTTCGAGGAGGCCACCAAGTTTGCCTTAACTT<br/>TCTGCAGGAGATGCTGGTCAAGGACCGACTGCAGGAGCGATGGGTGATCTCCGACCACTCTT<br/>TGACGAGATCAAGCTGGCCTGAAGATGCCCTGGTACGCCACCCTGACTGAGTTGAGGCTGC<br/>TTACTACCTGGACACTACGCCGCTCCGGTGACGTTTTGGATCGGTAAGTCTTCTACCAGATG<br/>CCCGAGATCTCAACGACACTACAAGGAGCTGGCCATTCTGGACTTCAACCGATGCCAGACTC<br/>CAGCACCAGCTGGAGTACATTCACATGAGGAGTGGTACGACCGATGCTCCCTGTCAGGATTC<br/>GGCATCTCAAGCGAGAGCTGCTGCGATCTACTTCTGGCCGCTGCTACCATCTTTGAGCCCG<br/>AGCGAACCCAGGAGCAGTCTGTGGTAAGACCCGAATTTTGCCAAAGATGATCACTCCCTT<br/>CGTCAACATCTCCGGCACCACCTGTCCCTGGACTACAACCTCAACCGCTGGACGATCATC<br/>TCTCCGCCAACGAGGACCGGCTGGTGGTACTCTGCTGGTACTTCCACCAGCTGCTGG<br/>ACGGTTTTCGACATCTACCCCTGCACCAGCTCAAGCAGCTGCTGGTCCCGATGGTTCATGAAGGT<br/>CCAGCAGGGCGAGGGCTCTGGTGGTGGAGGACGCTGTTCTGCTCGCAACACCGCTGAACATG<br/>CGCCGGTCTGAACGAGGACGCTCTGTCTAACAACGAGTACACCGCCCTGTCCACCCTACCAAC<br/>AAGATTTGCAACCGACTGGCCAGATCCAGGACAACAAGATCTCTCAGGTCTGCGACGGGTCC<br/>ATCAAGGACAAGGAGCTGGAGCAGGACATGCAGGCCCTCGTTAAGCTGGTCTGAGGAGAAC<br/>GGCGGGCTGTTGACCGAAACATTCGACACACCTTCTCTCCGTTCTCAAGACCTTCTACTACG<br/>ACGCTTACCACGACGACGAGACCAGCCGACTGCACATCTTCAAGGTCCTGTTCCGACCTGCTGC<br/>TTAA</p>                                                                                           |

|                                                                                                                                                                                                                                                                                         |                                                                                                                                                                                                                                                                                                                                                                                                                                                                                                                                                                                                                                                                                                                                                                                                                                                                                                                                                                                                                                                                                                                                                                                                                                                                                                                                                                                                                                                                                                                                                                                                                                                                                                                                                                                                                                                                                                                                           |
|-----------------------------------------------------------------------------------------------------------------------------------------------------------------------------------------------------------------------------------------------------------------------------------------|-------------------------------------------------------------------------------------------------------------------------------------------------------------------------------------------------------------------------------------------------------------------------------------------------------------------------------------------------------------------------------------------------------------------------------------------------------------------------------------------------------------------------------------------------------------------------------------------------------------------------------------------------------------------------------------------------------------------------------------------------------------------------------------------------------------------------------------------------------------------------------------------------------------------------------------------------------------------------------------------------------------------------------------------------------------------------------------------------------------------------------------------------------------------------------------------------------------------------------------------------------------------------------------------------------------------------------------------------------------------------------------------------------------------------------------------------------------------------------------------------------------------------------------------------------------------------------------------------------------------------------------------------------------------------------------------------------------------------------------------------------------------------------------------------------------------------------------------------------------------------------------------------------------------------------------------|
| <p>Codon optimized<br/> sclareol synthase<br/> coding DNA (<i>SsScS</i>)<br/> for <i>Y. lipolytica</i><br/> based on the<br/> sequence of sclareol<br/> synthase (GenBank:<br/> AFU61898.1) from<br/> <i>Salvia sclarea</i></p>                                                         | <p>ATGTCCCTGGCTTTCAACGTCGGCGTCAACCCCTTCTCCGGCCAGCGAGTTGGTTCCCGAAAGG<br/> AGAATTCCCCGTCCAGGGCTTCCCCGTTACCACCCTAACCCGATCCCGACTGATCGTCAACTG<br/> TTCCCTGACCACCACGACTTCATGGCTAAGATGAAGGAGAACTTTAAGCGGAGAGCGACAAA<br/> GTCCCCACCACCACCCTGCGATTCGGAGGACATCCCTTCCAACCTGTGCATCATCGACACC<br/> CTGCAGCGACTGGGCGTCGACCAATTTTTTTCAGTACGAGATCAACACCATCCCTCGACAACACT<br/> TTCCGACTGTGGCAGGAGAACACAAAGTTCATCTACGGCAACGTCAACCACCACCGCATGGCTT<br/> TCCGACTGCTGCGAGTCAAGGGCTACGAGGTCCTCCGAGGAGCTGGCTCCTACCGTAACCA<br/> GGAGGCCGCTCCCAGCAGACCAACGACCTGCCTATGATCATCGAGCTGTACCAGCCGCCAA<br/> CGAGCGAATCTACGAGGAGGAGCGATGCCCTGGAGAAGATTCTGCGCTGGACCACCATTTTTCT<br/> CAACAAGCAGGTCCAGGACAACCTCATCCCCGACAAGAAGCTGCACAAGCTGGTCGAGTTTTA<br/> CCTGCGAACTACAAGGCATCACCATCCGACTCGGTGCTCGACGAAACCTGGAGCTGTACGA<br/> CATGACCTACTACCAGGCCCTGAAGTCCACCAACCGATTCTCCAACCTGTGTAACGAGGACCTC<br/> CTGGTCTTCGCCAAGCAGGACTTCGACATCCACGAGGCCAGAACAGAGGACTGCAGCAG<br/> CTGCAGCGATGGTACGCTGACTGCCGACTGGACACCCTGAACCTCGGCCGAGCAGCTGTGATC<br/> GTTGCCAACTACCTGGCTTCCCTGATTATCGGGGACCACGCTTCGACTACGTCACCGACTGGCTT<br/> CGCCAAGACCTCCGTTCTGGTACCATCATGGACGACTTTTTTACTGCCACGGCTCCTCCAG<br/> GAGTGTGACAAGATCATCGAGCTGTCAAGGAGTGAAGGAGAACCCGACGCTGAGTACGG<br/> CTCCGAGGAGCTCGAGATCCTGTTTTATGGCCCTGTACAACACCGTCAACGAGCTGGCCGAGC<br/> AGCTCGAGTTGAGCAGGCTCGATCCGTCAGGAGTTCCTGGTGAAGCTGTGGGTGGAGATCCT<br/> GTCCGCCTTCAAGATCGAGCTGGACACCTGGTCCAACGGCACCCAGCAGTCTTTTGACGAGTAC<br/> ATCTCCTTCTCCGCTGTCCAACGGCTCCCGACTCACCGGTCTGCTGACCATGACGATTCGTCGG<br/> CGTCAAGCTCTCCGACGAGATGCTCATGTCCGAGGAGTGCACCCGACTGGCTCGACACGTTTGC<br/> ATGGTCCGGCGACTGCTGAACGACGCTGTGCTTCCGAGCGAGAGCGAGGAGGAGAATCGCC<br/> GGTAAGTCTACTCCATCCTCTGGCCACCGAGAAGGACGGTCAAGGAGTCCGAGGACGAG<br/> GCTATCGCCGAGATTAACGAGATGGTTCGAGTACCCTGGCGAAAGGCTCTGCAGATCGTCTAC<br/> AAGAAGGAGTCCATCCTGCCCGACGATGTAAGGACGCTTTCTGGAGATGGCCAAGGGCACC<br/> TTCTACGCTACGGCATTAAACGACGAGCTGACCTCCCCCAGCAGCTAAGGAGGACATGAAG<br/> TCCTTCGTTTTTAA</p> |
| <p>Endogenous<br/> geranylgeranyl<br/> diphosphate<br/> synthase (<i>YIGPPS</i>)<br/> coding DNA (<i>GGS1</i>,<br/> YALI0D17050g)</p>                                                                                                                                                   | <p>TAGGATTATAACAGCGCGATTTCGAAGGAGATATGGGGCAAGGCCGCCGACCCGCGCTGCTG<br/> GGACCGTACAACTACCTCGCCAAACACCGGGGCCACAACATCAGAGAACAATTGATCGCAGCG<br/> TTCGGAGCGGTTATCAAGGTGGACAAGAGCGATCTCGAGACCATTTCCGACATCACAAGATT<br/> TTGCATAACTCGTCGCTGCTTGGTATGACGTGGAAAGACAACCTGATGCTCCGACGAGGCTGC<br/> CGGCAGCCATTGCTGTTTGGAGTCCCCAAACCATCAACTCCGCCAACTACATGACTTTGT<br/> GGCTCTGCAGGAGGTGCTCAAGTCAAGTCTTATGATGCCGTCTCCATTTTACCAGGAAATG<br/> ATCAACTTGCATAGAGGTCAGGGATGGATCTTACTGGAGAGAAACACTACTTCCGCTCCG<br/> AAGACGAGTATCTGGAGATGGTGGTGCACAAGACCGGTGGACTGTTTCCGGCTGGCTCTGAGC<br/> TTATGCTGTCCGTTGGCATGAAACAGGAGGACCATGAAAAGATCAACTTTGATCTCACACCC<br/> TTACCGACACACTGGGAGTCAATTAACGATTCTGGATGATTACCTCAACCTCCAGTCCACCGGA<br/> ATTGACCGAGAACAAGGGATTCTCGGAAGATATCAGCGAAGGAAAGTTTTCGTTCCCGCTGAT<br/> TCACAGCATACGCCAACCCGGATAACCCAGGAGATTCTCAACATTCTCAAACAGCGAACAAG<br/> CGACGCTTCACTCAAAAAGTACCGCTGGACTACATGAGAACAGAAACCAAGAGTTTTCGACTA<br/> CTGCCTCAAGAGGATACAGGCCATGCTCACTCAAGGCAAGTTCGTACATTGATGATCTAGCAGC<br/> AGCTGGCCACGATGCTCCAAGTACGAGCATTTTGCATTATTTTGTGCCACCTCTGACTGTG<br/> AGGAGAGAAAAGTACTTTGAGGATGCCGAGTGA</p>                                                                                                                                                                                                                                                                                                                                                                                                                                                                                                                                                                                                                                                                                                                                                                                                                                   |
| <p>Codon optimized<br/> geranylgeranyl<br/> diphosphate<br/> synthase (<i>SsGGPPS</i>)<br/> for <i>Y. lipolytica</i><br/> based on the<br/> geranylgeranyl<br/> diphosphate<br/> synthase (<i>GGPPS7</i>,<br/> GenBank:<br/> WP011429285.1)<br/> from <i>Synechococcus</i><br/> sp.</p> | <p>ATGGTCCGCTCAGACCTTCAACCTGGACACCTACCTGTCCCAGCGACAGCAGCAGGTTGAG<br/> GAGGCTCTGTCTGCTGCTCTGGTCCCTGCTTACCCTGAGCGAATCTACGAGGCCATGCGATACT<br/> CCCTCCTGGCTGGTGGTAAGCGACTGCGACCTATCCTCTGCCTCGCTGCTTGTGAGCTGGCTGG<br/> TGGCTCTGTTGAGCAGGCTATGCCTACCCTGCTGCTGAGATGATTCACACCATGTCTCTG<br/> ATCCACGACGACCTCCCGCTATGGACAACGACGACTTTCGACGAGGCAAGCCTACCAACCAC<br/> AAGTCTTCGGCGAGGACATCGCCATTCTGGCTGGTACGCTCTGCTGGCTTACGCTTTCGAGC<br/> ACATCGCCTCCAGACCCGAGGTGTTCCCTCCTCAGCTGGTCTCCAGGTCATCGCTCGAATCCGG<br/> TCACGCTGTGCTGCTACCGGCTGCTGGTGGTCAAGTTGTCGACCTGGAGTCCGAGGGTAAAG<br/> GCTATCTCCCTGGAGACCCTCGAGTACATTCACCTCCACAAGACCGGCCCTGCTGGAGGCTT<br/> CTGTTGTTTCTGGCGGTATCCTGGCCGGCTGACGAGGAGCTGTGGCTCGACTGTCTCACTA<br/> CGCTCGAGACATTGGCCTGCCCTTTCAGATCGTCGACGACATTCGGACGCTGACCTACCTCT<br/> GAGCAGCTGGTAAGACCCTGGTAAGGACCAGGCTGCTGTAAGGCTACCTACCTTCCCTG<br/> CTGGGTCTGGAGGCTTCCCGACAGAAGGCTGAGGAGCTGATTAGTCCGCCAAGGAGGCTCTG<br/> CGACCTTACGGTTTCAGGCTGAGCCTCTCCTGGCTCTGGCTGACTTATTACCAGCAGCAGC<br/> ACTAA</p>                                                                                                                                                                                                                                                                                                                                                                                                                                                                                                                                                                                                                                                                                                                                                                                                                                                                                                                                        |
| <p>Codon optimized<br/> geranylgeranyl<br/> diphosphate<br/> synthase<br/> (<i>PaGGPPS</i>) for <i>Y.</i><br/> <i>lipolytica</i> based on<br/> the 390-719 AA of</p>                                                                                                                    | <p>ATGCTCTCGACAGGCTGAGTCTCTCCAGTGCATTCCAACGAGGGCAAGGATCTTCAGCGAG<br/> TGGACACCGACCACATTTTCTTGGAGAAGGCTGTTTTGGAGGCTCCTTACGACTACATTGCCTC<br/> CATGCCTTCCAAGGGTGTTCGTGATCAGTTTCAICGACGCTCTCAACGACTGGCTGCGGGTGCCC<br/> GACGTCAAGGTTCGGTAAGATCAAGGACGCGCTGCGCGTACTGCATAAATAGCTCTACTTCTGG<br/> ATGACTTCCAGGACAACCTCGCTCTCCGTAAGGAAAGCCCTCCACCACAACATCTTCGGATC<br/> AGCCCAGACGGTCAACACCGCCACTTATAGTATCATAAAGGCCATCGGCCAGATCATGGAGTT<br/> TTCAGCTGGAGAGTCTGTCAGGAGGTCATGAACCTCATCATGATTCTCTTTTCAAGGACAGGCC<br/> ATGGACCTGTTCTGACCTACAACGGCCACGTTCCCTCTGAGGAGGAGTACTACCGAATGATTG<br/> ACCAGAAAACCTGGCCAACCTGTTTTCAATTGCAACTTCTTCTGTCTCAATGCTGCCGATAACGA<br/> AATCCCGCGAACGAAAAATCCAGAGGCTTTTACATCGACTGACACCGCTACTTGGAAAGATGCTT<br/> CCAGATTTCGAGACGACTACCAGAACCTGGTTTCTGCTGATTACCAAGCAGAAGGGCTTCTGC<br/> GAGGATCTCGATGAGGGGAAGTGGTGGCTGGCGCTCATTACATGATCCACAAGCAACGGGAC<br/> CATATGGCGTTGTTAATGTGCTTTCAACAGGACGAAAAGCACGGCTGATGATGACCTCGAGCA<br/> AAACAGTTTGTGCTGGACATTATCGAGGAAGAAAAGTCCCTCGATTATACTAGGTCTGTGATGA</p>                                                                                                                                                                                                                                                                                                                                                                                                                                                                                                                                                                                                                                                                                                                                                                                                                                                                                                                             |



|                                                                                                                                                                                                               |                                                                                                                                                                                                                                                                                                                                                                                                                                                                                                                                                                                                                                                                                                                                                                                                                                                                                                                                                                                                                                                                                            |
|---------------------------------------------------------------------------------------------------------------------------------------------------------------------------------------------------------------|--------------------------------------------------------------------------------------------------------------------------------------------------------------------------------------------------------------------------------------------------------------------------------------------------------------------------------------------------------------------------------------------------------------------------------------------------------------------------------------------------------------------------------------------------------------------------------------------------------------------------------------------------------------------------------------------------------------------------------------------------------------------------------------------------------------------------------------------------------------------------------------------------------------------------------------------------------------------------------------------------------------------------------------------------------------------------------------------|
| <p>Fusicoccadiene Synthase (GenBank: A2PZA5.1) from <i>Phomopsis amygdal</i></p>                                                                                                                              | <p>TGGATCTGCACGTGCAGCTGAGAGCCGAAATTGGCCGATTGAGATTCTGTTGGACTCGCCCAA<br/>CCCCGCAATGCGACTCTGTGGAACTGCTGCGAGTCCATCACCACCACCATCATTGA</p>                                                                                                                                                                                                                                                                                                                                                                                                                                                                                                                                                                                                                                                                                                                                                                                                                                                                                                                                                        |
| <p>Codon optimized geranylgeranyl diphosphate synthase (<i>SaGGPPS</i>) for <i>Y. lipolytica</i> based on geranylgeranyl diphosphate synthase (GenBank: BAA43200.1) from <i>Sulfolobus acidocaldarius</i></p> | <p>ATGTCTTACTTCGACAACACTTCAACGAGATCGTGAACCTGTGAACGACATCATCAAGTCTT<br/>ACATCTCTGGCGACGTGCCAAGCTGTACGAGGCCTTTACCACCTGTTACCTCTGGCGGCAA<br/>GCGACTGCGACCCCTGATCCTGACCATCTTTCTGACCTGTTCCGGCGGACAGCGAGAGCGAGCC<br/>TACTACGCCGGCGCCGCCATCGAGGTGCTGCACACCTTACCCTGGTGCACGACGACATCATGG<br/>ACCAAGACAACATCCGACGAGGCCTGCCACCCTGCACGTGAAGTATGGCCTGCCTCTGGCTA<br/>TTCTGGCCGGCGATCTGCTGCACGCCAAGGCCTTTCAGCTGCTGACCCAAGCCCTGCGAGGCCT<br/>GCCCTCTGAAACCATCATCAAGGCCTTCGACATCTTACCCTGATCTATCATTATCATCTCTGAG<br/>GGCCAAGCCGTGGACATGGAGTTCGAGGACCGAATCGACATCAAGGAGCAAGAGTACCTGGA<br/>CATGATCTCTCGAAAAGACCCGCCCTGTCTCTGCCTTCTCTATCGGGCCCTGATCGCCG<br/>GCGCCAACGACAACGACGTGCGACTGATGTCTGACTTCGGCACCAACCTGGGCATCGCCTTCA<br/>GATCGTGGACGACATCTGGCCTGACCGCCGACGAGAAGGAGCTGGGCAAGCCCGTGTCTC<br/>TGACATCCGAGAGGGCAAGAAGACCATCCTGGTATCAAGACCCCTGGAGCTGTGTAAGGAGGA<br/>CGAGAAGAAGATCGTGTGAAGGCCCTGGGCAACAAGTCTGCCTTAAAGGAGGAGCTGATGTC<br/>TTCTGCCGACATCAAGAAGTACTCTTGGACTACGCTACAACCTGGCCGAGAAGTACTAC<br/>AAGAACGCCATCGACTCTGTAACCAAGTGTCTTCTAAGTCTGACATCCCCGGCAAGGCCCTGA<br/>AGTACCTGGCCGAGTTCACCATCGAAGACGAAAGTAA</p> |
| <p>Codon optimized linker (GGGS)<sub>3</sub> and peptide RIDD for <i>Y. lipolytica</i> based on reference<sup>2</sup></p>                                                                                     | <p>GGTGGTGGTGGTCTGGTGGTGGTGGCTCTGGTGGTGGCGGTTGTGGTTCTCTGCGAGAGTGTG<br/>AGCTGTACGTGCAGAAGCACAACATTCAGGCTCTGCTGAAGGACTTATTGTGCAGCTGTGTAC<br/>CGCTCGACCTGAGCGACCCATGGCTTTTCTGCGAGAGTACTTTGAGCGACTGGAGAAGGAGGA<br/>GGCCAAG</p>                                                                                                                                                                                                                                                                                                                                                                                                                                                                                                                                                                                                                                                                                                                                                                                                                                                                 |
| <p>Codon optimized linker (GGGS)<sub>3</sub> and peptide RIAD for <i>Y. lipolytica</i> based on reference<sup>2</sup></p>                                                                                     | <p>GGAGGCGGCGGATCTGGCGGAGGAGGCTCTGGAGGCGGAGGATGCGGCCCTGGAGCAGTACGC<br/>CAATCAGCTGGCCGATCAGATCATCAAGGAGGCCACCGAGGCTGT</p>                                                                                                                                                                                                                                                                                                                                                                                                                                                                                                                                                                                                                                                                                                                                                                                                                                                                                                                                                                   |
| <p>TEFin Promoter</p>                                                                                                                                                                                         | <p>AGAGACCGGGTGGCGGCGCATTGTGTCCAAAAAACAGCCCAATTGCCCAATTGACCCC<br/>AAATTGACCCAGTAGCGGGCCAAACCCCGCGAGAGCCCTTACCCACATATCAAACCTC<br/>CCCCGGTCCCACACTTGGCGTTAAGGGCGTAGGGTACTGCAGTCTGGAATCTACCGTTGTTC<br/>GACTTTGTAAGTACTTCTTGTCTGGCCATCCGGGTAACCCATGCCGACGCAAAAATAGACTAC<br/>TGAAAATTTTTTGTCTTGTGGTTGGGACTTTAGCCAAGGGTATAAAAAGACCACCGTCCCCGAA<br/>TTACCTTTCTCTTCTTCTCTCTCTCTCTCTCTCTCTCTCTCTCTCTCTCTCTCTCTCTCTCT<br/>CTGAGTATAAGAATCATTCAAAATGGTGAGTTTCAGAGGCAGCAGCAATTGCCACGGGCTTG<br/>AGCACACGGCCGGGTGTGGTCCCATTCCCATCGACACAAGACGCCACGTCATCCGACCAGCAC<br/>TTTTTGCAGTACTAACCAG</p>                                                                                                                                                                                                                                                                                                                                                                                                                                                                                                             |
| <p>xpr2t Terminator</p>                                                                                                                                                                                       | <p>GATCCAACACTACGGAACCTGTGTGTGATGTCTTTGCCCGGCTCCGATATCATCTCTGCCTCTTAC<br/>CAGTCCGACTCTGGTACTTTGGTCTACTCCGGTACCTCCATGGCCTGTCCCCACGTTGCCGGTCT<br/>TGCTCCTACTACCTGTCCATCAATGACGAGGTTCTCACCCTGCCAGGTCGAGGCTCTTATTA<br/>CTGAGTCCAACACCGGTGTTCTTCCACCACCAACCTCAAGGCTCTCCCAACGCTGTGGCTA<br/>CAACGGTGTGGCATTAGGCAATTAACAGATAGTTTGGCCGGTGTATAATCTCTTAACTCCCA<br/>CACTCCTTTGACATAACGATTATATGTAACGAAACTGAAAATTTGACCAGATATTGTTGTAATAAG<br/>AAAATCTGGCTTGTAGGTGGCAAAATGCGGCTCTTTGTTTCAATTCCTCTGTGACTACTC<br/>GTCATCCCTTATGTTGACTGTCTGATTTCTTATTTCCATACATATGCAAGTGAGATGCCGT<br/>GTC</p>                                                                                                                                                                                                                                                                                                                                                                                                                                                                                                                  |
| <p>mig1t Terminator</p>                                                                                                                                                                                       | <p>CACTGGCCGGTCGATAAATTTAACGTGCTGAGCTCAGCACACGCATTGCCATTGGCTGTATATA<br/>GATGAATGTAATGATACCGTAAGAGAATGAGAGCACGGTATTGTATTACAGGGGATTAAGTAC<br/>ACATTACTTGGAGTCTGTACCAGAAGACTACTATACATGGTATTACTTACATTAGAGTCCG<br/>TGACCGTATTCTGCTCGTATAGACATAAATTTTCCCTACCCACATTTGTTCTGGGCCCTCCGGAG<br/>CACATCTACAGTGAGTACTGTTTTCAGTTGAGCTTGAGGGGTTAAGTAAGTGGGGGAAGGGTT<br/>TGGGATTCTGAAAAGAGCATGACTAATCTCTCTGTGGAGGAGCAATGAAGTACGCTGATGCA<br/>ATCATACCGGTGTATCGGATCTGCCTGGGTGTCTGATTACTAATCATTACTACACTGTTTCC<br/>CAGCTATCTCATCATCTCAGAGCCTCGGCCAGCCTTCGGCCCTTTGGGTTT</p>                                                                                                                                                                                                                                                                                                                                                                                                                                                                                                                                      |

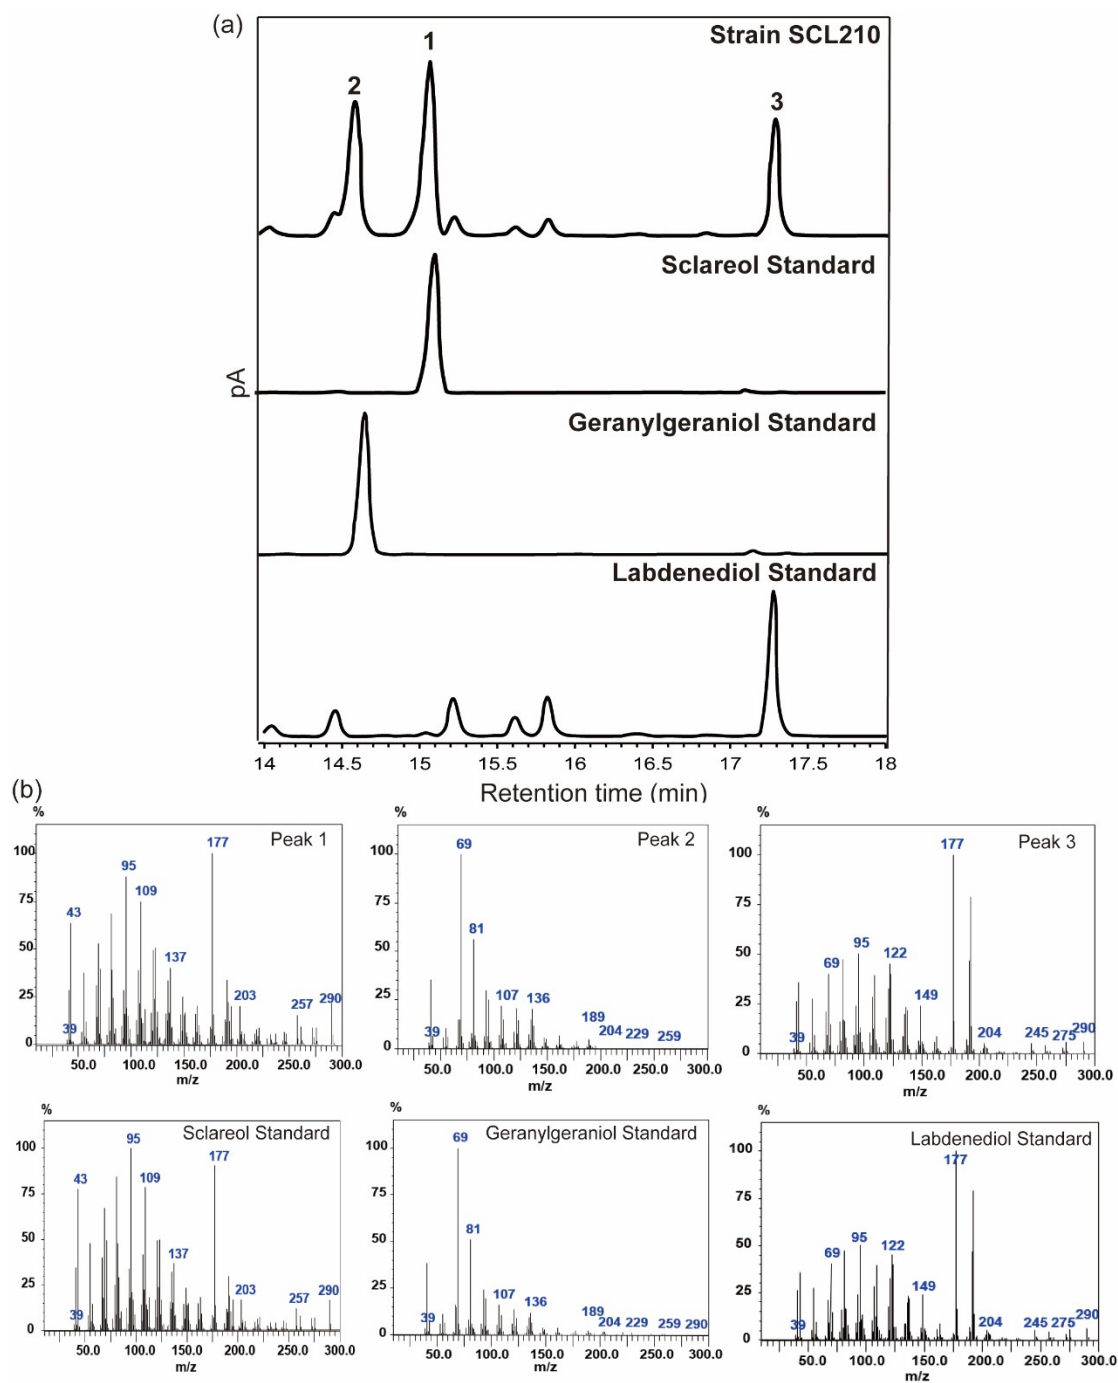

**Supplementary Figure 1. GC-MS analysis of the diterpenoid standards and the products generated by strain SCL210.** (a) Gas chromatogram of dodecane phase obtained from strain SCL210 culture after 120 h fermentation and gas chromatogram of sclareol standard (retention time 15.1 min), geranylgeraniol (GGOH) standard (retention time 14.6 min), labdenediol (LOH) standard (retention time 17.3 min). (b) The mass spectrum of peak 1-3 and the diterpenoid standards.

## References

1. Y. Ma, W. Li, J. Mai, J. Wang, Y. Wei, R. Ledesma-Amaro and X.-J. Ji, *Green Chem.*, 2021, **23**, 780-787.
2. W. Kang, T. Ma, M. Liu, J. Qu, Z. Liu, H. Zhang, B. Shi, S. Fu, J. Ma, L. T. F. Lai, S. He, J. Qu, S. Wing-Ngor Au, B. Ho Kang, W. C. Yu Lau, Z. Deng, J. Xia and T. Liu, *Nat. Commun.*, 2019, **10**, 4248.
